# Supplementary material for: Accelerating the generation and discovery of high-performance donor materials for organic solar cells by deep learning
Source: Royal Society of Chemistry journal article supplement (doi:10.1039/d4ta03944k), 2024-01-01
Supplement: d4ta03944k1.pdf [file d4ta03944k1.pdf]

Supplementary Information:

## Accelerating the generation and discovery of high-performance donor materials for organic solar cells by deep learning

Jinyu Sun, Dongxu Li, Yue Wang, Ting Xie, Yingping Zou, Hongmei Lu \*and Zhimin Zhang \*

College of Chemistry and Chemical Engineering, Central South University, Changsha 410083, China

\* Corresponding author E-mail: hongmeilu@csu.edu.cn; zmzhang@csu.edu.cn

|                                                                                                                                                                                                                                                                                                       |    |
|-------------------------------------------------------------------------------------------------------------------------------------------------------------------------------------------------------------------------------------------------------------------------------------------------------|----|
| <b>Figure S1. The architecture of quantum deep field in DeepDonor.</b> .....                                                                                                                                                                                                                          | 3  |
| <b>Figure S2. The results of hyperparameter optimization on the validation set.</b> The selection of learning rate on the SM (a) and PM (b) datasets. The selection of numbers of hidden layers on the SM (c) and PM (d) datasets. The selection of optimizers on the SM (e) and PM (f) datasets..... | 4  |
| <b>Figure S3. The learning curves of QDF-SM.</b> The loss (a) and MAE (b) curves of HK-DNN of QDF-SM. The loss (c) and MAE (d) curves of PCE-DNN of QDF-SM. ....                                                                                                                                      | 5  |
| <b>Figure S4. The learning curves of QDF-PM.</b> The loss (a) and MAE (b) curves of HK-DNN of QDF-PM. The loss (c) and MAE (d) curves of PCE-DNN of QDF-PM. ....                                                                                                                                      | 6  |
| <b>Figure S5. The UMAP low dimensional embedding of the training and test sets of SM (a) and PM (b) datasets. (c) The absolute error distribution of the test sets.</b> .....                                                                                                                         | 6  |
| <b>Table S1. Descriptors used for screening donor materials.</b> .....                                                                                                                                                                                                                                | 7  |
| <b>Table S2. Prediction results of different methods on the test sets</b> .....                                                                                                                                                                                                                       | 7  |
| <b>Table S3. The evaluation metrics of molecules generated by VAE.</b> .....                                                                                                                                                                                                                          | 7  |
| <b>Table S4. The repeat unit of candidate polymer structures</b> .....                                                                                                                                                                                                                                | 8  |
| <b>Table S5. The detailed properties of selected candidates.</b> .....                                                                                                                                                                                                                                | 11 |
| <b>Table S6. Electrochemical properties of the candidates.</b> .....                                                                                                                                                                                                                                  | 11 |
| <b>Table S7. New small molecule donor materials collected from literature to the end of 2021</b> .....                                                                                                                                                                                                | 12 |
| <b>Table S8. New polymer molecule donor materials collected from literature to the end of 2021</b> .....                                                                                                                                                                                              | 14 |
| <b>Table S9. The structures and appearance times of cores and side-chains</b> .....                                                                                                                                                                                                                   | 15 |
| <b>Table S10. New small molecule donor materials collected from literature from 2022 and 2023.</b> .....                                                                                                                                                                                              | 17 |
| <b>Table S11. New polymer molecule donor materials collected from literature from 2022 and 2023.</b> .....                                                                                                                                                                                            | 18 |
| <b>Supplementary Note 1</b> .....                                                                                                                                                                                                                                                                     | 20 |
| <b>References</b> .....                                                                                                                                                                                                                                                                               | 21 |

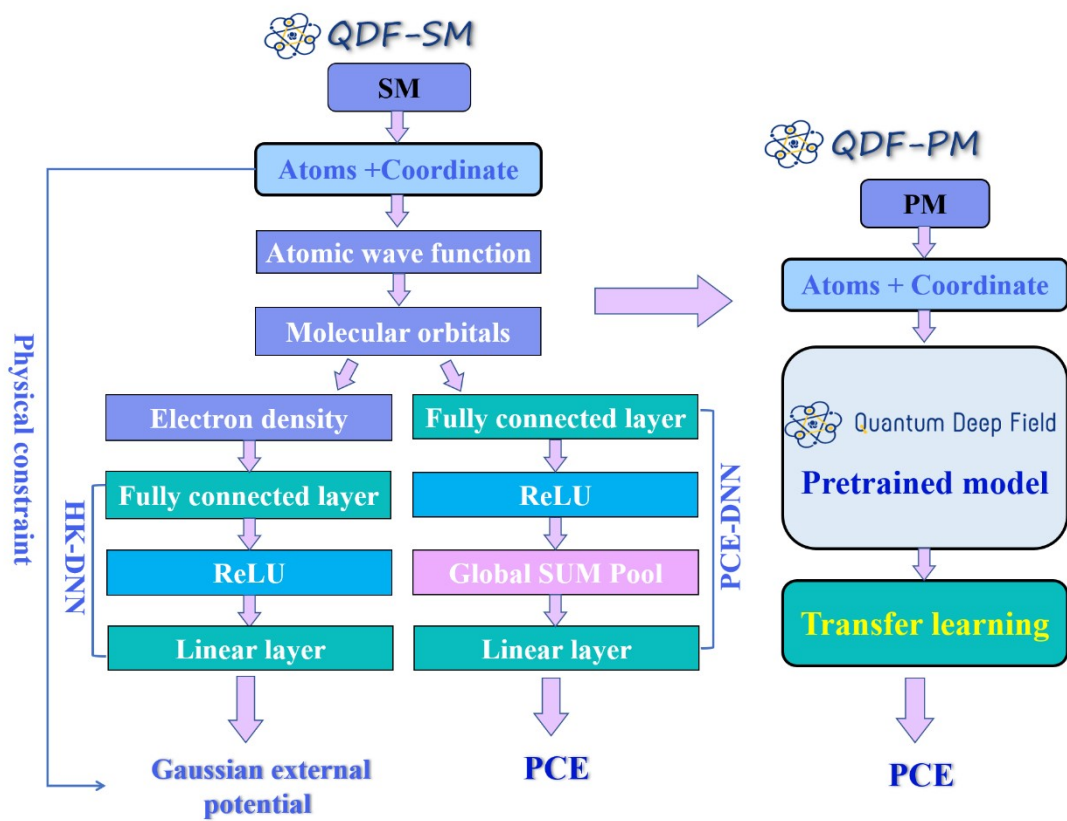

Figure S1. The architecture of quantum deep field in DeepDonor.

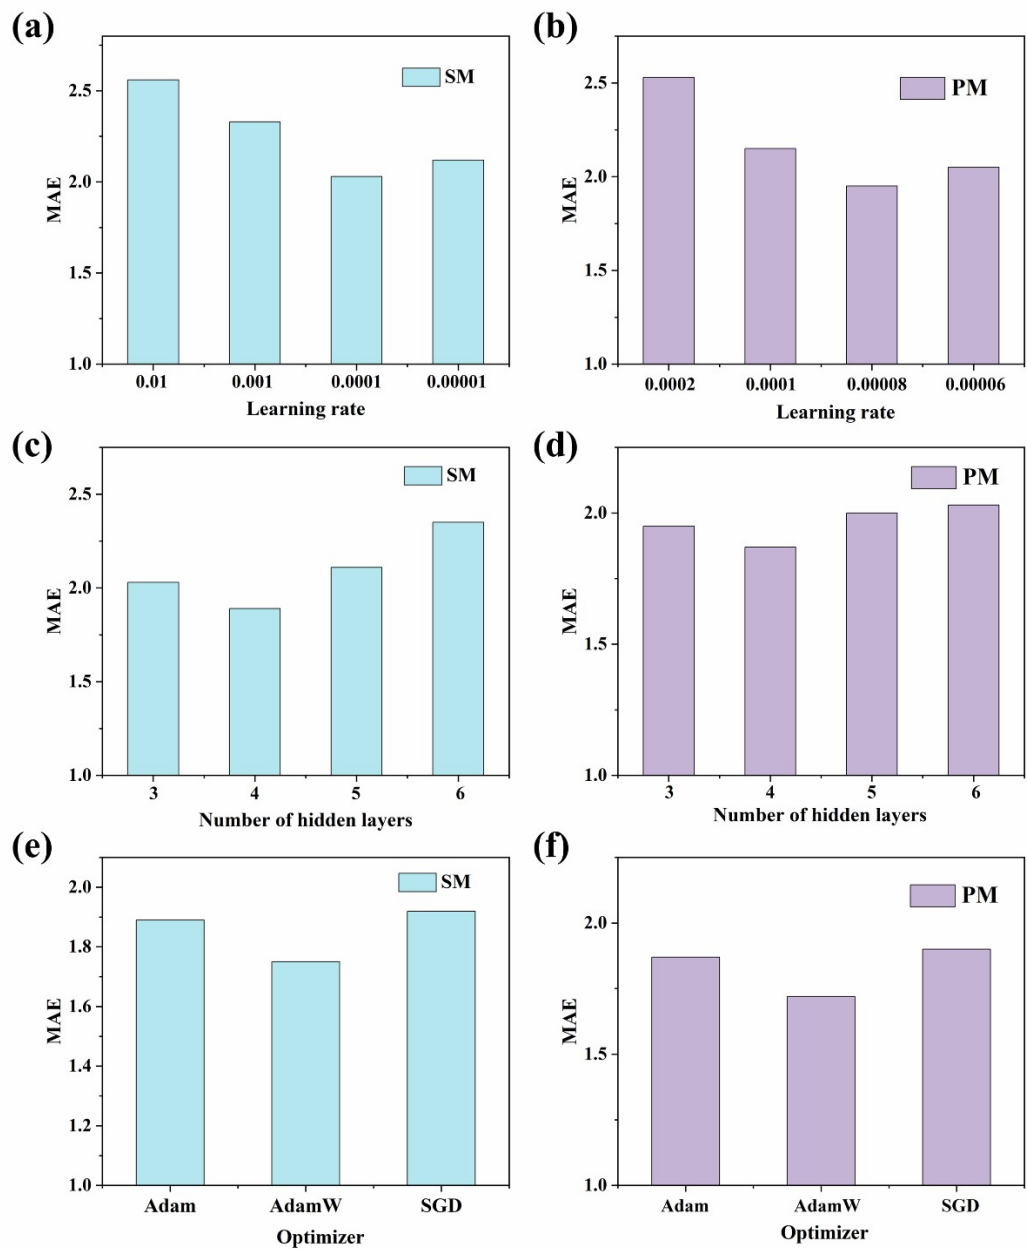

**Figure S2. The results of hyperparameter optimization on the validation set.** The selection of learning rate on the SM (a) and PM (b) datasets. The selection of numbers of hidden layers on the SM (c) and PM (d) datasets. The selection of optimizers on the SM (e) and PM (f) datasets.

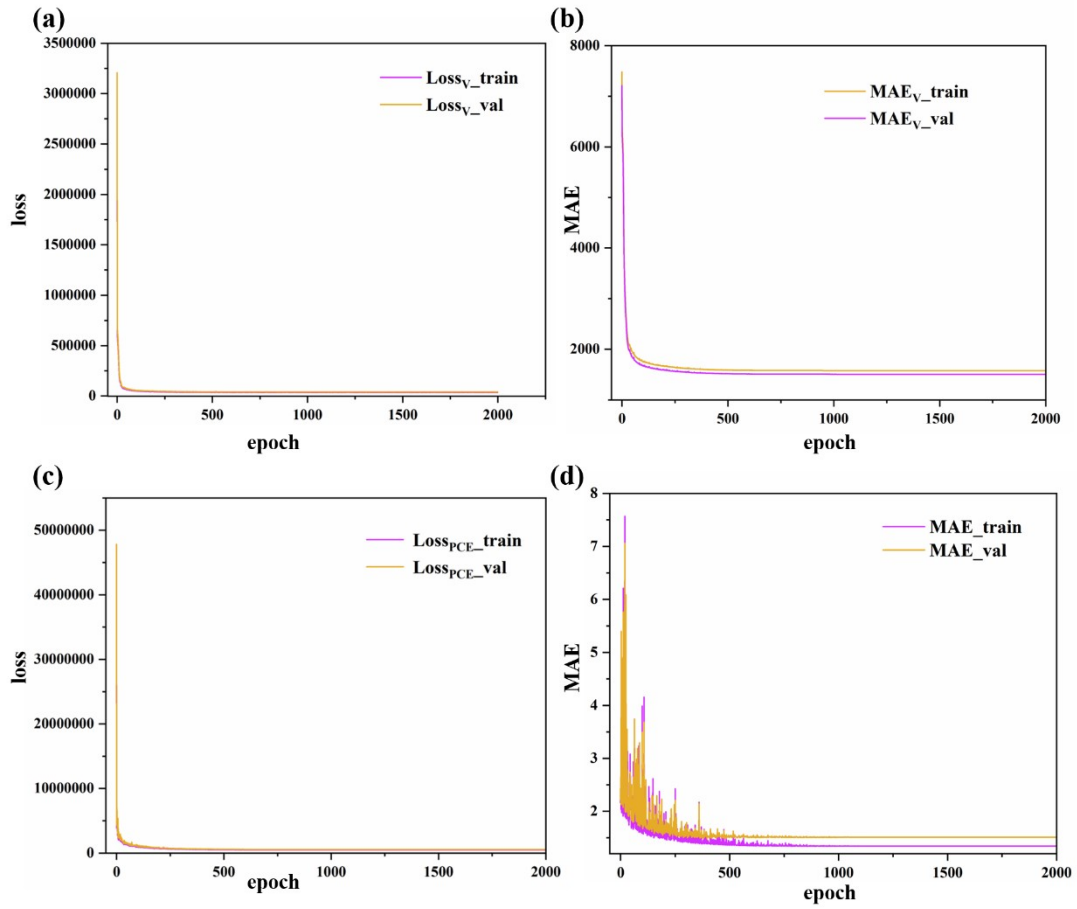

**Figure S3. The learning curves of QDF-SM.** The loss (a) and MAE (b) curves of HK-DNN of QDF-SM. The loss (c) and MAE (d) curves of PCE-DNN of QDF-SM.

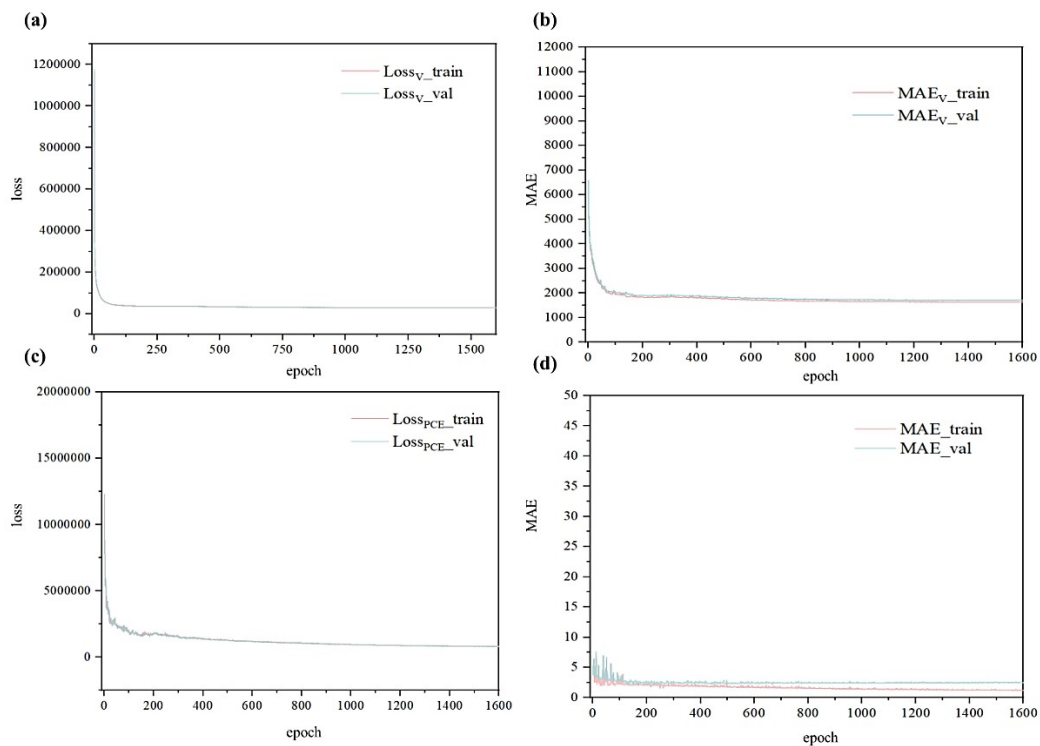

**Figure S4. The learning curves of QDF-PM.** The loss (a) and MAE (b) curves of HK-DNN of QDF-PM. The loss (c) and MAE (d) curves of PCE-DNN of QDF-PM.

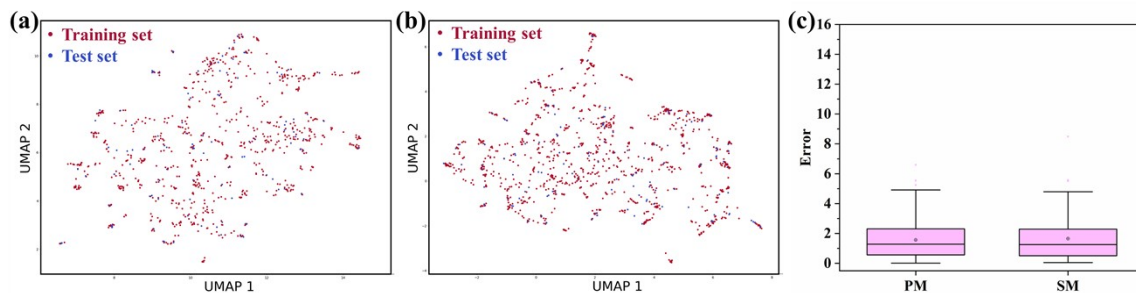

**Figure S5. The UMAP low dimensional embedding of the training and test sets of SM (a) and PM (b) datasets. (c) The absolute error distribution of the test sets.**

**Table S1. Descriptors used for screening donor materials.**

| Descriptor              | Description                                  | Values   |
|-------------------------|----------------------------------------------|----------|
| MolLogP                 | Wildman-Crippen LogP value                   | 8.7~40.7 |
| MolWt                   | The average molecular weight of the molecule | 485~1967 |
| NOCOUNT                 | The number of Nitrogens and Oxygens          | 0~6      |
| NumHAcceptors           | The number of Hydrogen Bond Acceptors        | 3~15     |
| NumHDonors              | The number of Hydrogen Bond Donors           | 0~2      |
| NumHeteroatoms          | The number of Heteroatoms                    | 5~18     |
| NumRotatableBonds       | The number of Rotatable Bonds                | 13~55    |
| RingCount               | Ring count                                   | 2~13     |
| NumAromaticHeterocycles | The number of aromatic heterocycles          | 0~11     |
| NumAromaticRings        | The number of aromatic rings for a molecule  | 0~12     |
| SAScore                 | Synthetic accessibility                      | 0~7.5    |
| SCScore                 | Synthetic complexity                         | <4.999   |
| DeepChemStable          | Compound stability                           | 0~0.98   |
| DeepDonor               | PCE                                          | >9       |

**Table S2. Prediction results of different methods on the test sets**

| Data             | Model     | $r$  | $R^2$ | MAE  | Accuracy |
|------------------|-----------|------|-------|------|----------|
| Small Molecule   | DeepDonor | 0.82 | 0.65  | 1.67 | 0.70     |
|                  | GNN       | 0.66 | 0.61  | 2.05 | 0.59     |
|                  | ANN       | 0.63 | 0.37  | 2.20 | 0.57     |
|                  | RF        | 0.76 | 0.58  | 1.81 | 0.69     |
|                  | GB        | 0.64 | 0.40  | 2.27 | 0.56     |
| Polymer Molecule | DeepDonor | 0.77 | 0.59  | 1.59 | 0.73     |
|                  | GNN       | 0.71 | 0.42  | 1.70 | 0.71     |
|                  | ANN       | 0.48 | 0.11  | 2.28 | 0.63     |
|                  | RF        | 0.74 | 0.54  | 1.63 | 0.71     |
|                  | GB        | 0.65 | 0.38  | 1.85 | 0.68     |

**Table S3. The evaluation metrics of molecules generated by VAE.**

| Metrics | Validity $\uparrow$ | Uniqueness $\uparrow$ | Novelty $\uparrow$ | IntDiv $\uparrow$ | FCD $\downarrow$ |
|---------|---------------------|-----------------------|--------------------|-------------------|------------------|
| Values  | 1                   | 0.888                 | 1                  | 0.961             | 0.195            |

**Table S4. The repeat unit of candidate polymer structures**

|                                                                                     |                |                                                                                     |                |                                                                                     |                |                                                                                       |                |
|-------------------------------------------------------------------------------------|----------------|-------------------------------------------------------------------------------------|----------------|-------------------------------------------------------------------------------------|----------------|---------------------------------------------------------------------------------------|----------------|
| 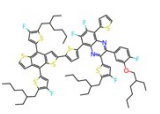   | No.1<br>12.55  |    | No.2<br>18.60  |    | No.3<br>14.72  |    | No.4<br>15.57  |
|    | No.5<br>9.81   |    | No.6<br>18.60  |    | No.7<br>18.60  |    | No.8<br>16.97  |
|    | No.9<br>10.17  |    | No.10<br>11.81 |    | No.11<br>9.53  |    | No.12<br>15.84 |
|    | No.13<br>15.30 |    | No.14<br>15.42 |    | No.15<br>15.42 |    | No.16<br>15.40 |
|   | No.17<br>13.17 |   | No.18<br>13.62 |   | No.19<br>9.37  |   | No.20<br>13.62 |
|  | No.21<br>9.18  |  | No.22<br>11.28 |  | No.23<br>11.78 |  | No.24<br>10.53 |
|  | No.25<br>12.68 |  | No.26<br>18.60 |  | No.27<br>13.39 |  | No.28<br>12.15 |
|  | No.29<br>9.00  |  | No.30<br>9.69  |  | No.31<br>13.33 |  | No.32<br>16.97 |
|  | No.33<br>15.35 |  | No.34<br>12.74 |  | No.35<br>12.59 |  | No.36<br>9.6   |
|  | No.37<br>16.29 |  | No.38<br>14.85 |  | No.39<br>12.61 |  | No.40<br>12.26 |

Continued Table S4.

|                                                                                     |                |                                                                                     |                    |                                                                                     |                |                                                                                       |                |
|-------------------------------------------------------------------------------------|----------------|-------------------------------------------------------------------------------------|--------------------|-------------------------------------------------------------------------------------|----------------|---------------------------------------------------------------------------------------|----------------|
| 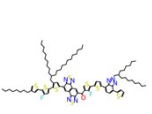   | No.41<br>18.60 |    | No.4<br>2<br>13.98 |    | No.43<br>13.07 |    | No.44<br>10.19 |
|    | No.45<br>11.27 |    | No.4<br>6<br>11.49 |    | No.47<br>9.40  |    | No.48<br>18.60 |
|    | No.49<br>15.42 |    | No.5<br>0<br>16.29 |    | No.51<br>13.20 |    | No.52<br>14.63 |
|    | No.53<br>16.08 |    | No.5<br>4<br>9.24  |    | No.55<br>11.64 |    | No.56<br>11.58 |
|   | No.57<br>10.51 |   | No.5<br>8<br>9.24  |   | No.59<br>17.49 |   | No.60<br>18.60 |
|  | No.61<br>9.42  |  | No.6<br>2<br>15.74 |  | No.63<br>18.60 |  | No.64<br>9.22  |
|  | No.65<br>11.63 |  | No.6<br>6<br>10.40 |  | No.67<br>14.82 |  | No.68<br>12.68 |
|  | No.69<br>9.13  |  | No.7<br>0<br>11.07 |  | No.71<br>9.25  |  | No.72<br>12.78 |
|  | No.73<br>11.14 |  | No.7<br>4<br>16.02 |  | No.75<br>9.37  |  | No.76<br>10.25 |
|  | No.77<br>9.41  |  | No.7<br>8<br>9.53  |  | No.79<br>9.25  |  | No.80<br>9.44  |



Continued Table S4.

|                                                                                   |                |                                                                                   |                |                                                                                   |                |                                                                                     |                |
|-----------------------------------------------------------------------------------|----------------|-----------------------------------------------------------------------------------|----------------|-----------------------------------------------------------------------------------|----------------|-------------------------------------------------------------------------------------|----------------|
| 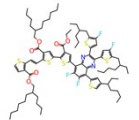 | No.81<br>12.88 |  | No.82<br>10.17 |  | No.83<br>10.03 |  | No.84<br>10.16 |
|  | No.85<br>9.71  |  | No.86<br>10.04 |  | No.87<br>17.19 |  | No.88<br>10.29 |
|  | No.89<br>18.57 |  | No.90<br>18.60 |                                                                                   |                |                                                                                     |                |

**Table S5. The detailed properties of selected candidates.**

| Descriptor              | Candidate 1 | Candidate 2 |
|-------------------------|-------------|-------------|
| MolLogP                 | 28.35       | 33.79       |
| MolWt                   | 1406.0      | 1658.4      |
| NOCOUNT                 | 3           | 4           |
| NumHAcceptors           | 10          | 10          |
| NumHDonors              | 0           | 0           |
| NumHeteroatoms          | 16          | 17          |
| NumRotatableBonds       | 32          | 45          |
| RingCount               | 11          | 11          |
| NumAromaticHeterocycles | 8           | 7           |
| NumAromaticRings        | 11          | 11          |
| SAScore                 | 6.34        | 7.14        |
| SCScore                 | 4.99        | 4.99        |
| DeepChemStable          | 0.968       | 0.968       |
| DeepDonor               | 12.55       | 18.60       |

**Table S6. Electrochemical properties of the candidates.**

|                       | $E_{\text{HOMO}}$ (eV) | $E_{\text{LUMO}}$ (eV) | $E_{\text{g}}^{\text{ec}}$ (eV) |
|-----------------------|------------------------|------------------------|---------------------------------|
| <b>Candidate 1</b>    | -5.57                  | -3.58                  | 1.99                            |
| <b>Candidate 2</b>    | -5.59                  | -3.52                  | 2.07                            |
| <b>Candidate 1-1F</b> | -5.58                  | -3.52                  | 2.06                            |
| <b>Candidate 1-0F</b> | -5.49                  | -3.44                  | 2.05                            |

**Table S7. New small molecule donor materials collected from literature to the end of 2021**

| Index | Voc   | Jsc   | FF     | PCE   | HOMO   | LUMO   | NAME      | Reference |
|-------|-------|-------|--------|-------|--------|--------|-----------|-----------|
| 1     | 0.804 | 21.71 | 60.95  | 10.64 | -5.021 | -2.816 | BTEC      | 1         |
| 2     | 0.87  | 21.21 | 61.35  | 11.33 | -5.109 | -2.853 | BTEC-F    | 1         |
| 3     | 0.854 | 21.55 | 72.35  | 13.34 | -5.116 | -2.855 | BTEC-2F   | 1         |
| 4     | 0.94  | 17.5  | 70.1   | 11.5  | -5.36  | -3.64  | P2TBR     | 2         |
| 5     | 0.86  | 24.17 | 0.655  | 13.61 | -5.46  | -3.7   | BTR-Cl    | 3         |
| 6     | 0.85  | 22.25 | 0.564  | 10.67 | -5.34  | -3.53  | BTR       | 3         |
| 7     | 0.88  | 15.37 | 66.56  | 8.85  | -5.05  | -3.3   | BDT-RO    | 4         |
| 8     | 0.81  | 22.2  | 0.608  | 10.9  | -5.23  | -3.59  | FYSM-H    | 5         |
| 9     | 0.85  | 22.54 | 62.35  | 11.95 | -5.37  | -3.57  | s35       | 6         |
| 10    | 0.97  | 14.86 | 0.63   | 9.03  | -5.41  | -2.9   | BER6      | 7         |
| 11    | 0.96  | 11.1  | 0.51   | 5.52  | -5.44  | -2.99  | BECN      | 7         |
| 12    | 0.87  | 22.5  | 0.69   | 13.35 | -5.41  | -3.57  | BT-RO-Cl  | 8         |
| 13    | 0.87  | 22.93 | 0.7    | 13.9  | -5.41  | -3.58  | BT-Reh-Cl | 8         |
| 14    | 0.88  | 21.6  | 0.626  | 11.4  | -5.29  | -3.43  | P-PHS     | 9         |
| 15    | 0.84  | 25.4  | 0.756  | 15.9  | -5.34  | -3.42  | M-PHS     | 9         |
| 16    | 0.819 | 20.32 | 0.506  | 8.42  | -5.39  | -2.79  | SM1-EH    | 10        |
| 17    | 0.766 | 22.39 | 0.684  | 11.73 | -5.12  | -2.8   | SM1-Oct   | 10        |
| 18    | 0.829 | 17    | 0.413  | 5.82  | -5.14  | -3.44  | 3BDT-4    | 11        |
| 19    | 0.84  | 21.3  | 0.581  | 10.4  | -5.15  | -3.4   | 3BDT-5    | 11        |
| 20    | 1.057 | 15.07 | 0.568  | 9.05  | -5.64  | -3.61  | DRTB-CT   | 12        |
| 21    | 0.85  | 22.3  | 0.69   | 13.1  | -5.41  | -3.5   | TBD-S2    | 13        |
| 22    | 0.859 | 27.46 | 74.11  | 17.38 | -5.5   | -3.36  | BTBR-2F   | 14        |
| 23    | 0.865 | 21.8  | 0.583  | 11    | -5.59  | 3.69   | B3T-T     | 15        |
| 24    | 0.813 | 25.6  | 0.717  | 14.9  | -5.26  | -3.65  | B3T-P     | 15        |
| 25    | 0.88  | 23.2  | 0.68   | 13.9  | -5.58  | -3.59  | BTTZR     | 16        |
| 26    | 0.849 | 21.77 | 0.6774 | 12.53 | 5.29   | -3.13  | FBD-S3    | 17        |
| 27    | 0.854 | 24.53 | 0.721  | 15.1  | -5.31  | -3.14  | TBD-S4    | 17        |
| 28    | 0.969 | 17.24 | 0.64   | 10.76 | -5.64  | -3.61  | DRTB-FT   | 18        |
| 29    | 0.885 | 19.78 | 0.688  | 12.02 | -5.56  | -3.6   | ZR1-S-CL  | 19        |
| 30    | 0.774 | 24.5  | 0.726  | 13.76 | -5.17  | -3.43  | BDTT-TR   | 20        |
| 31    | 0.805 | 23.59 | 0.67   | 12.72 | -5.25  | -2.78  | SM1       | 21        |
| 32    | 0.825 | 23.23 | 0.677  | 12.94 | -5.32  | -2.81  | SM1-S     | 21        |
| 33    | 0.866 | 23.25 | 0.699  | 14.07 | -5.37  | -2.81  | SM1-F     | 21        |
| 34    | 0.865 | 20.1  | 0.713  | 12.4  | -5.58  | -3.39  | BSCL-C2   | 22        |
| 35    | 0.865 | 21.5  | 0.7    | 13.03 |        |        | BSCL      | 23        |
| 36    | 0.94  | 16.69 | 0.58   | 9.11  | -5.44  | -3.53  | BDTF-CA   | 24        |
| 37    | 0.83  | 25.27 | 0.73   | 15.3  | -5.37  | -3.51  | B1        | 25        |
| 38    | 0.861 | 24.34 | 68.44  | 14.34 | -5.32  | -3.53  | ZR1       | 26        |
| 39    | 0.85  | 23.16 | 0.7    | 13.69 | -5.59  | -3.61  | BSFTR     | 27        |
| 40    | 0.83  | 19.69 | 0.68   | 11.19 | -6     | -1.96  | 2CL7T     | 28        |

Continued Table S7

|    |       |       |        |       |       |       |          |    |
|----|-------|-------|--------|-------|-------|-------|----------|----|
| 41 | 0.84  | 18.6  | 0.599  | 9.4   | -5.27 | -3.4  | SE-1     | 29 |
| 42 | 0.87  | 19.42 | 0.612  | 10.3  | -5.12 | -3.44 | SE-2     | 29 |
| 43 | 0.848 | 21.35 | 0.6512 | 11.79 | -5.36 | -3.55 | ZR2-C1   | 30 |
| 44 | 0.852 | 23.03 | 0.6543 | 12.84 | -5.35 | -3.51 | ZR2-C2   | 30 |
| 45 | 0.854 | 24.69 | 0.7    | 14.78 | -5.34 | -3.5  | ZR2-C3   | 30 |
| 46 | 0.939 | 17.3  | 0.632  | 10.1  | -5.43 | -3.39 | H13      | 31 |
| 47 | 0.943 | 18.3  | 0.7    | 12    | -5.46 | -3.47 | H14      | 31 |
| 48 | 0.83  | 23.1  | 0.56   | 10.8  | -5.4  | -3.27 | BOHTR    | 32 |
| 49 | 0.84  | 21.5  | 0.68   | 12.3  | -5.36 | -3.24 | BIHTR    | 32 |
| 50 | 0.853 | 22.38 | 0.72   | 13.8  | -5.4  | -3.4  | BT-2F    | 33 |
| 51 | 0.81  | 24.55 | 0.63   | 12.45 | -5.05 | -2.68 | SM-DTBDT | 34 |
| 52 | 0.84  | 21.63 | 0.588  | 10.68 | -5.1  | -2.7  | SM-BDT   | 34 |
| 53 | 0.851 | 21.23 | 0.7256 | 13.1  | -5.21 | -3.55 | SM8      | 35 |
| 54 | 0.837 | 19.2  | 0.659  | 10.5  | -5.23 | -3.57 | SM12     | 35 |
| 55 | 0.88  | 23.2  | 0.68   | 13.9  | -5.58 | -3.59 | SL1      | 36 |
| 56 | 0.89  | 21.6  | 0.6    | 11.5  | -5.6  | -3.62 | SL2      | 36 |
| 57 | 0.88  | 21.6  | 0.67   | 12.7  | -5.58 | -3.6  | SL3      | 36 |
| 58 | 0.87  | 23    | 0.62   | 12.4  | -5.57 | -3.57 | SL4      | 36 |
| 59 | 0.784 | 24.59 | 0.7278 | 14.03 | -5.17 | -3.43 | TBFT-TR  | 20 |
| 60 | 0.95  | 15.72 | 0.626  | 10.4  | -5.4  | -3.24 | DRTT-R   | 37 |

**Table S8. New polymer molecule donor materials collected from literature to the end of 2021**

| ID | PCE   | Voc   | Jsc   | FF   | HOMO  | LUMO  | NAME          | Reference |
|----|-------|-------|-------|------|-------|-------|---------------|-----------|
| 1  | 15.55 | 0.844 | 26.02 | 0.71 | -5.55 | -2.91 | PBQ5          | 38        |
| 2  | 17.62 | 0.851 | 26.58 | 0.78 | -5.64 | -3.18 | PBQ6          | 38        |
| 3  | 7.16  | 0.82  | 13.76 | 0.64 | -5.24 | -3.55 | PDTBDT-SBTEH  | 39        |
| 4  | 8.61  | 0.94  | 13.81 | 0.66 | -5.43 | -3.67 | PDTBDT-SFBTEH | 39        |
| 5  | 11.47 | 0.9   | 21.86 | 0.59 | -5.6  | -3.49 | PBDTT2Cl      | 40        |
| 6  | 17.1  | 0.87  | 27.7  | 0.71 | -5.47 | -3.48 | PBDTT1Cl      | 40        |
| 7  | 10.9  | 0.92  | 17.5  | 0.68 | -5.52 | -3.65 | PBSF-A12      | 41        |
| 8  | 13.4  | 0.92  | 20.5  | 0.71 | -5.5  | -3.59 | PBSF-D12      | 41        |
| 9  | 16.1  | 0.88  | 25.2  | 0.72 |       |       | PBNT-BDD      | 42        |
| 10 | 8.22  | 0.895 | 17.18 | 0.54 | -5.67 | -3.28 | PDTBDT        | 43        |
| 11 | 12.71 | 0.78  | 24.21 | 0.66 | -5.4  | -3.21 | PDTBDT-T      | 43        |
| 12 | 15.63 | 0.86  | 24.46 | 0.72 | -5.58 | -3.26 | PDTBDT-T-Cl   | 43        |
| 13 | 11.5  | 0.87  | 18.83 | 0.70 | -5.5  | -3.74 | PV2TC-BDD     | 44        |
| 14 | 8.56  | 0.71  | 20.49 | 0.59 | -5.35 | -3.56 | PV2TC-FTAZ    | 44        |
| 15 | 5.89  | 0.86  | 13.87 | 0.49 | -4.34 | -2.16 | PvBDT-F       | 45        |
| 16 | 7.76  | 0.9   | 15.04 | 0.57 | -4.4  | -2.24 | PvBDT-Cl      | 45        |
| 17 | 17.1  | 0.85  | 27.2  | 0.74 | -5.58 | -3.66 | PBCT-2F       | 46        |
| 18 | 17.21 | 0.85  | 25.81 | 0.79 | -5.44 | -3.47 | D18           | 47        |
| 19 | 17.97 | 0.87  | 26.83 | 0.77 | -5.46 | -3.49 | D18-Cl        | 47        |
| 20 | 10.08 | 1.11  | 13.68 | 0.66 | -5.35 | -3.54 | PE31          | 48        |
| 21 | 7.4   | 1.1   | 11.65 | 0.58 | -5.22 | -3.3  | PE32          | 48        |
| 22 | 8.99  | 1.16  | 12.68 | 0.61 | -5.42 | -3.55 | PE33          | 48        |
| 23 | 8.64  | 1.21  | 11.36 | 0.63 | -5.46 | -3.58 | J52-CL        | 48        |
| 24 | 9.7   | 0.9   | 16.1  | 0.67 | -5.66 | -3.88 | PM6F          | 49        |
| 25 | 15.3  | 0.92  | 21.2  | 0.79 | -5.6  | -3.52 | PFBCPZ        | 50        |
| 26 | 12.81 | 0.89  | 19.91 | 0.72 | -5.33 | -3.43 | PFBDT-8ttTPD  | 51        |
| 27 | 15.05 | 0.84  | 24.99 | 0.72 | -5.46 | -3.57 | PCIBDT-8ttTPD | 51        |
| 28 | 13.1  | 0.88  | 20.5  | 0.72 | -5.4  | -3.6  | PBDB-T-SF     | 52        |
| 29 | 11.62 | 0.73  | 21.63 | 0.74 | -5.35 | -3.43 | P4T2F-HD      | 53        |
| 30 | 16.32 | 0.88  | 24.79 | 0.75 | -5.52 | -2.76 | PTQ11         | 54        |
| 31 | 13.45 | 0.81  | 25.83 | 0.64 | -5.38 | -3.14 | PBQ7          | 55        |
| 32 | 16.34 | 0.85  | 25.77 | 0.75 | -5.47 | -2.89 | PBQ510        | 55        |
| 33 | 15.1  | 0.83  | 23.9  | 0.76 | -5.48 | -3.68 | PBTT-F        | 56        |
| 34 | 7.58  | 0.865 | 12.4  | 0.71 | -5.37 | -3.63 | PBNS          | 57        |
| 35 | 14.86 | 0.83  | 25.36 | 0.68 | -5.51 | -3.64 | PBDT-F        | 58        |
| 36 | 15.63 | 0.85  | 25.69 | 0.71 | -5.53 | -3.64 | PBDT-Cl       | 58        |
| 37 | 11.58 | 0.74  | 24.91 | 0.63 | -5.35 | -3.48 | PBDT-H        | 58        |
| 38 | 14.35 | 0.915 | 22.56 | 0.70 | -5.43 | -3.54 | PBDT-ST       | 59        |
| 39 | 13.72 | 0.896 | 22.67 | 0.68 | -5.47 | -3.57 | PNDT-ST       | 59        |
| 40 | 11.39 | 1.01  | 17.89 | 0.63 | -5.6  | -3.65 | P1            | 60        |

**Table S9. The structures and appearance times of cores and side-chains**

| Dataset | Structure   | Substructures and the appearance times |
|---------|-------------|----------------------------------------|
| PM      | cores       |                                        |
|         |             |                                        |
| PM      | side-chains |                                        |

Continued Table S9

SM

cores

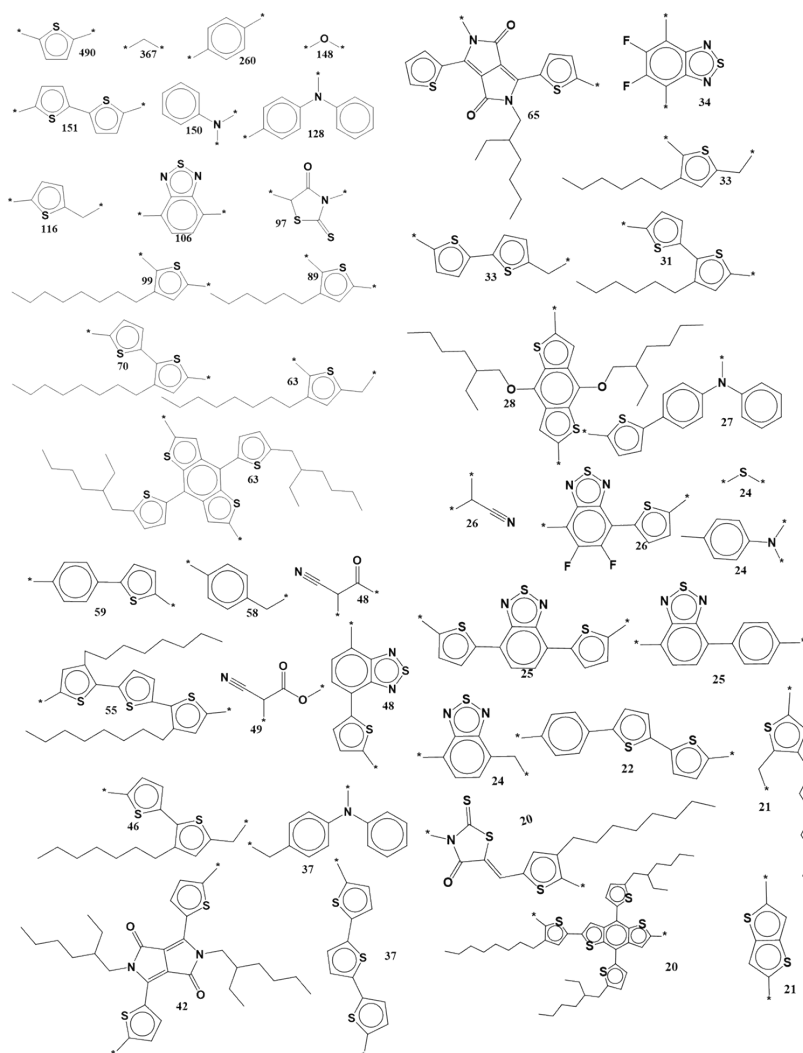

SM

side-chains

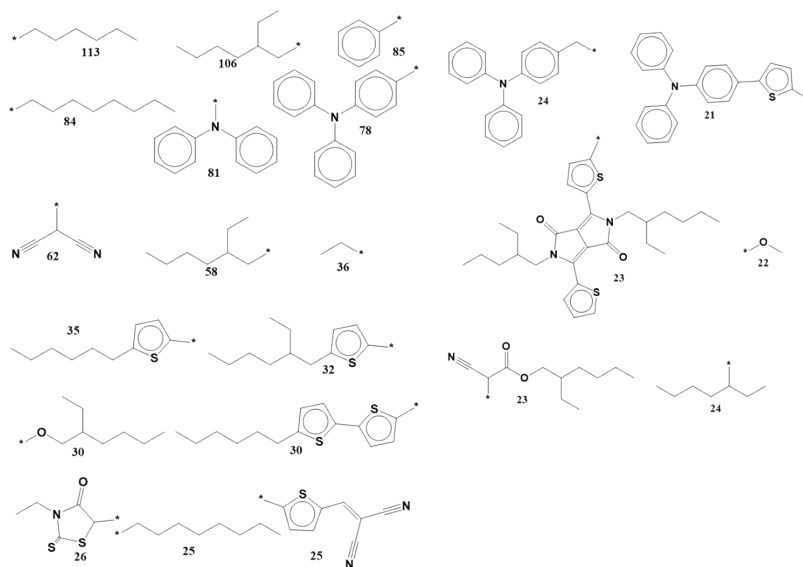

**Table S10. New small molecule donor materials collected from literature from 2022 and 2023.**

| Name             | HOMO  | LUMO  | Voc   | Jsc   | FF    | PCE   | Reference |
|------------------|-------|-------|-------|-------|-------|-------|-----------|
| W2-CA            | -5.17 | -3.53 | 0.83  | 25.19 | 76.8  | 16.06 | 61        |
| W2-Reh           | -5.16 | -3.48 | 0.826 | 25.31 | 74.8  | 15.63 | 61        |
| BBTSM-1          | -5.58 | -3.51 | 0.87  | 21.6  | 63    | 11.8  | 62        |
| Tz6T-iP          | -5.29 | -3.64 | 849.1 | 25.55 | 72.49 | 15.7  | 63        |
| Tz6T-P           | -5.37 | -3.76 | 876.1 | 24.83 | 67.4  | 14.7  | 63        |
| MPhS-C2          |       |       | 0.867 | 24.42 | 74.08 | 15.67 | 64        |
| MPhS-Ph          |       |       | 0.859 | 23.63 | 72.75 | 14.77 | 64        |
| CBTSeEHR         | -5.45 | -3.61 | 0.881 | 18.76 | 0.732 | 12.1  | 65        |
| BTEHR-CTb        | -5.56 | -3.47 | 0.908 | 17.43 | 0.685 | 10.84 | 65        |
| CBTSeHR          | -5.47 | -3.62 | 0.871 | 15.28 | 0.698 | 9.3   | 65        |
| C3-CN            | -5.38 | -3.42 | 1.05  | 20.54 | 0.68  | 14.62 | 66        |
| C3               | -5.28 | -3.09 | 0.96  | 18.41 | 0.62  | 10.85 | 66        |
| SM-REH           |       |       | 0.85  | 25.42 | 72.4  | 15.6  | 67        |
| SM-EH-R          |       |       | 0.85  | 23.73 | 71.3  | 14.4  | 67        |
| SM-R             |       |       | 0.86  | 24.64 | 66.2  | 14    | 67        |
| SM-EH-R          |       |       | 0.85  | 21.96 | 63.4  | 11.9  | 67        |
| DRTT-6Se         | -5.54 | -3.44 | 0.85  | 25.29 | 69.9  | 15.03 | 68        |
| DRTT-2Se         | -5.51 | -3.46 | 0.85  | 25.18 | 68.8  | 14.79 | 68        |
| DRTT-T           | -5.57 | -3.36 | 0.85  | 24.85 | 62.9  | 13.37 | 68        |
| As-TCp           | -5.30 | -2.78 | 0.873 | 24.45 | 74.9  | 16.46 | 69        |
| S-TCp            | -5.27 | -2.76 | 0.87  | 23.88 | 73.83 | 15.77 | 69        |
| S-BF             | -5.32 | -2.80 | 0.868 | 22.91 | 69.39 | 14.92 | 69        |
| SM- <i>s</i> -Bu | -5.24 | -3.53 | 0.841 | 25.18 | 74.34 | 16.06 | 70        |
| SM- <i>n</i> -Bu | -5.19 | -3.61 | 0.83  | 24.75 | 72.12 | 15.12 | 70        |
| BTEHR-CT         | -5.56 | -3.47 | 0.946 | 17.05 | 0.69  | 11.13 | 71        |
| <i>a</i> -BTR-H4 | -5.30 | -3.54 | 0.815 | 24.8  | 53.5  | 11.36 | 72        |
| SW2              | -5.47 | -3.45 | 0.835 | 74    | 25.1  | 15.51 | 73        |
| SW1              | -5.42 | -3.43 | 0.806 | 63.8  | 25.09 | 12.9  | 73        |
| TBCA-C4          | -5.49 | -3.46 | 0.933 | 15.43 | 0.64  | 9.21  | 74        |



**Table S11. New polymer molecule donor materials collected from literature from 2022 and 2023.**

| Name               | HOMO  | LUMO  | Voc   | Jsc   | FF    | PCE   | Reference |
|--------------------|-------|-------|-------|-------|-------|-------|-----------|
| PBT                | -5.45 | -3.37 | 0.79  | 25.6  | 63.3  | 12.90 | 75        |
| PiBT               | -5.53 | -3.17 | 0.87  | 28.2  | 77.3  | 19.00 | 75        |
| PTO-HD             | -5.51 | -3.58 | 0.806 | 23.24 | 74.19 | 13.89 | 76        |
| PTO-BO             | -5.47 | -3.61 | 0.799 | 22.74 | 67.67 | 12.29 | 76        |
| PQx4T-2F           | -5.40 | -3.45 | 0.84  | 25.78 | 73.65 | 15.95 | 77        |
| PQx4T              | -5.30 | -3.35 | 0.82  | 24.82 | 65.37 | 13.30 | 77        |
| PBDTF-ttPTZ        |       |       | 0.715 | 23.87 | 65.60 | 11.03 | 78        |
| PJ-1               | -5.54 | -3.54 | 0.864 | 66.1  | 26.08 | 15.01 | 79        |
| PBTID              | -5.53 | -3.54 | 0.87  | 26.1  | 69.6  | 15.80 | 80        |
| PDTBTBz-2F         | -5.56 | -3.64 | 0.87  | 21.69 | 65.5  | 12.37 | 81        |
| PDTBTBz-2H         | -5.42 | -3.45 | 0.77  | 21.82 | 57.6  | 9.73  | 81        |
| PBDT-PiQ           | -5.40 | -3.34 | 0.85  | 20.82 | 63.51 | 11.28 | 82        |
| PNDT2              |       |       | 0.861 | 26.33 | 80    | 18.13 | 83        |
| PNDT1              |       |       | 0.865 | 25.85 | 77.2  | 17.27 | 83        |
| PBN-SBO            | -5.39 | -3.58 | 0.851 | 25.84 | 73.8  | 16.22 | 84        |
| PBN-S              | -5.33 | -3.48 | 0.848 | 24.71 | 61.4  | 12.86 | 84        |
| PZ2                | -5.48 | -3.69 | 0.817 | 60.01 | 22.88 | 11.21 | 85        |
| PZ3                | -5.5  | -3.68 | 0.83  | 60.5  | 21.44 | 10.77 | 85        |
| Z4                 | -5.59 | -3.41 | 0.807 | 26.27 | 71.06 | 15.12 | 86        |
| Z3                 | -5.42 | -3.38 | 0.798 | 20.07 | 66.71 | 10.68 | 86        |
| PBDQx- $\beta$ -Cl | -5.64 | -3.93 | 0.85  | 24.84 | 68.33 | 14.49 | 87        |
| PTzBTE             | -5.47 | -3    | 0.87  | 23.8  | 72    | 14.90 | 88        |
| P3                 | -5.38 | -3.51 | 0.742 | 22.8  | 74.3  | 12.56 | 89        |
| P1                 | -5.41 | -3.49 | 0.766 | 18.12 | 73.72 | 10.37 | 89        |
| P(TPTI-BDT)        | -5.30 | -3.26 | 0.86  | 20    | 70    | 11.70 | 90        |
| P(2DTP-BDT)        | -5.35 | -3.38 | 0.93  | 15.8  | 68    | 9.20  | 90        |
| PSe-HD             | -5.50 | -3.49 | 0.852 | 25.76 | 67.66 | 14.85 | 91        |
| PSe-BO             | -5.45 | -3.29 | 0.845 | 23.63 | 65.48 | 13.07 | 91        |
| PM6-F              | -5.62 | -3.74 | 0.93  | 21.71 | 66.56 | 13.44 | 92        |
| PFNT-Cl            | -5.51 | -3.53 | 0.842 | 26.03 | 80    | 17.53 | 93        |
| PTTB-F             |       |       | 0.882 | 26.56 | 77.08 | 18.06 | 94        |
| PTTB-H             |       |       | 0.827 | 24.49 | 65.88 | 13.34 | 94        |
| PBDF-TF-BTz        |       |       | 0.857 | 24.8  | 77.78 | 17.01 | 95        |
| BDF-dT-BTz         |       |       | 0.852 | 24.32 | 75.21 | 16.03 | 95        |
| PBDF-dF-BTz        |       |       | 0.863 | 23.08 | 74.42 | 15.59 | 95        |
| J52-FTh            | -5.51 | -3.68 | 0.92  | 21.29 | 68    | 13.32 | 96        |
| PNTB-HD            |       |       | 0.854 | 26.88 | 79    | 18.15 | 97        |
| PNTB-2T            |       |       | 0.841 | 26.07 | 76.5  | 16.77 | 97        |
| PBTz3Cl            | -5.56 | -3.6  | 0.888 | 26.6  | 77.81 | 18.38 | 98        |

Continued Table S11

|           |       |        |       |       |       |       |     |
|-----------|-------|--------|-------|-------|-------|-------|-----|
| PBTz-TC   | -5.47 | -3.52  | 0.84  | 20.91 | 72.69 | 12.81 | 99  |
| PBTz-TTC  | -5.38 | -3.51  | 0.84  | 18.47 | 61.4  | 9.52  | 99  |
| PM7-F     | -5.65 | -3.75  | 0.94  | 20.79 | 68.87 | 13.46 | 100 |
| P126      | -5.53 | -3.35  | 0.89  | 23.52 | 72    | 15.07 | 101 |
| P127      | -5.47 | -3.34  | 0.82  | 22.24 | 67    | 12.27 | 101 |
| PBDT-2FBn | -5.52 | -3.50  | 0.858 | 18    | 60.2  | 9.30  | 102 |
| L3        |       |        | 0.864 | 26.97 | 76.4  | 17.81 | 103 |
| PNBTz1    | -5.44 | -5.288 | 0.85  | 24    | 72    | 14.00 | 104 |
| PL2       | -5.49 | -3.98  | 0.69  | 23.3  | 62.66 | 10.12 | 105 |

## Supplementary Note 1

### 1. Device Fabrication

The OSC devices were fabricated with a structure of ITO/PEDOT:PSS/Photoactive layer/PFN-Br/Ag. The ITO substrates ( $10 \Omega \text{ sq}^{-1}$ ) were cleaned by sequential ultrasonic treatment in detergent, deionized water, and isopropanol. Then, the dried ITO substrates were treated with an ultraviolet-ozone chamber for 25 min. A thin layer of PEDOT:PSS was prepared on precleaned ITO glass through spin-coating a PEDOT:PSS aqueous solution (Heraeus-Clevios PVP Al 4083 from Xi'an Polymer Light Technology Corp. (China)) at 5000 rpm and baked subsequently at  $140^\circ\text{C}$  for 15 min in the air. The substrates were then transferred into an  $\text{N}_2$ -filled glovebox. A blend solution was prepared by dissolving the polymer donor and acceptor in chloroform with the same optimal donor/acceptor (D/A) weight ratios of 1:1.2 for blends with a total concentration of 16 mg/mL with 0.35% DIO by volume, and then the blend solution was spin-coated at 2500 rpm onto the PEDOT:PSS layer. After spin-coating, the active layers were annealed at  $95^\circ\text{C}$  for 10 min. Then, the methanol solution of PFN-Br at a concentration of  $0.5 \text{ mg mL}^{-1}$  is spin-coated at 3000 rpm to afford a cathode buffer layer. Finally, cathode metal Ag was deposited. The photoactive layer effective area of the device was  $4.8 \text{ mm}^2$ .

### 2. Synthesis of monomers and polymers

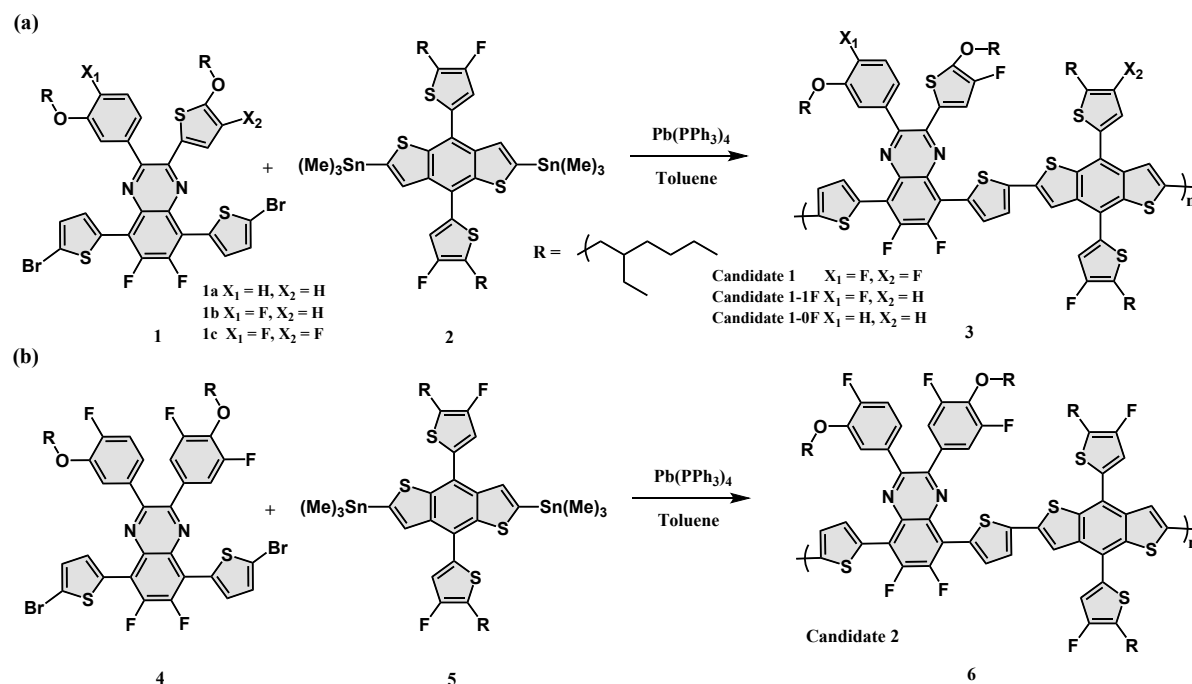

Figure S6. Synthetic route of the (a) Candidate 1 and (b) candidate 2.

Candidate 1, 1-0F and 1-1F have been published in our recent work.<sup>[106]</sup>

**Candidate 1-0F: 1a** (129 mg, 0.145 mmol), :4,8-Bis-[5-(2-ethyl-hexyl)-4-fluoro-thiophen-2-yl]-2,6-bis-trimethylstannanyl-1,5-dithia-s-indacene (136.8 mg, 0.145 mmol), and Pd(PPh<sub>3</sub>)<sub>4</sub> (4.2 mg, 0.004 mmol) were dissolved in 10 mL toluene and refluxed for 36h. After cooling down to room temperature, the mixture was poured into the 100 mL methanol and then stirred for 0.5h. Whereafter the precipitate was collected and extracted in the order of methanol, hexane, acetone, and chloroform. Subsequently, the polymer solution was removed chloroform solvent by rotary evaporation to obtain atropurpureus lamellar solid **Candidate 1-0F** (129 mg, 67 %).

**Candidate 1-1F** and **Candidate 1** were obtained with compound **1b** (0.162 g, 0.179 mmol) and **1c** (0.156 g, 0.169 mmol) following the general procedure described above. (Atropurpureus lamellar solid, 172 mg, 71 % and 183 mg, 78 %), respectively.

**Candidate 2 :4** (137.8 mg, 0.145 mmol), **:5** (4,8-Bis-[5-(2-ethyl-hexyl)-4-fluoro-thiophen-2-yl]-2,6-bis-trimethylstannanyl-1,5-dithia-s-indacene) (136.8 mg, 0.145 mmol), and Pd(PPh<sub>3</sub>)<sub>4</sub> (4.2 mg, 0.004 mmol) were dissolved in 10 mL toluene and refluxed for 24 h. After cooling down to room temperature, the mixture was poured into the 100 mL methanol and then stirred for 0.5h. Whereafter the precipitate was collected and extracted in the order of methanol, hexane, acetone, and chloroform. Subsequently, the polymer solution was removed chloroform solvent by rotary evaporation to obtain atropurpureus lamellar solid **Candidate 2** (140 mg, 68 %).

## References

1. Ge, J. et al. 13.34 % Efficiency Non-Fullerene All-Small-Molecule Organic Solar Cells Enabled by Modulating the Crystallinity of Donors via a Fluorination Strategy. *Angewandte Chemie International Edition* 59, 2808–2815 (2020).
2. Li, X. et al. A small molecule donor containing a non-fused ring core for all-small-molecule organic solar cells with high efficiency over 11%. *J. Mater. Chem. A* 7, 3682–3690 (2019).
3. Chen, H. et al. All-Small-Molecule Organic Solar Cells with an Ordered Liquid Crystalline Donor. *Joule* 3, 3034–3047 (2019).
4. Duan, T. et al. Terminal group engineering for small-molecule donors boosts the performance of nonfullerene organic solar cells. *J. Mater. Chem. A* 7, 2541–2546 (2019).
5. Su, W. et al. 13.4 % Efficiency from All-Small-Molecule Organic Solar Cells Based on a Crystalline Donor with Chlorine and Trialkylsilyl Substitutions. *ChemSusChem* 14, 3535–3543 (2021).
6. Wang, Q. et al. Introducing Siloxane-Terminated Side Chains in Small Molecular Donors for All-Small-Molecule Organic Solar Cells: Modulated Molecular Orientation and Enhanced Efficiency. *ACS Appl. Mater. Interfaces* 13, 36080–36088 (2021).
7. Zhao, J. et al. Wide-Band Gap Small-Molecule Donors with Diester-Terthiophene Bridged Units for High-Efficiency All-Small-Molecule Organic Solar Cells. *ACS Appl. Energy Mater.* 4, 5868–5876 (2021).
8. Chen, H. et al. Design of All-Small-Molecule Organic Solar Cells Approaching 14% Efficiency via Isometric Terminal Alkyl Chain Engineering. *Energies* 14, 2505 (2021).
9. Zhang, L. et al. High Miscibility Compatible with Ordered Molecular Packing Enables an Excellent Efficiency of 16.2% in All-small-molecule Organic Solar Cells. *Advanced Materials* n/a, 2106316.
10. Shi, K. et al. Effects of Alkyl Side Chains of Small Molecule Donors on Morphology and the Photovoltaic Property of All-Small-Molecule Solar Cells. *ACS Appl. Mater. Interfaces* 13, 54237–54245 (2021).
11. Yang, D. et al. Achieving 10% efficiency in non-fullerene all-small-molecule organic solar cells without extra treatments. *J. Mater. Chem. A* 9, 10427–10436 (2021).

12. Qiu, N. et al. Improving the performances of all-small-molecule organic solar cells by fine-tuning halogen substituents of donor molecule. *Organic Electronics* 99, 106340 (2021).
13. Wang, X. et al. Backbone Engineering with Asymmetric Core to Finely Tune Phase Separation for High-Performance All-Small-Molecule Organic Solar Cells. *ACS Appl. Mater. Interfaces* 13, 11108–11116 (2021).
14. Xu, L. et al. Achieving 17.38% efficiency of ternary organic solar cells enabled by a large-bandgap donor with noncovalent conformational locking. *J. Mater. Chem. A* 9, 11734–11740 (2021).
15. An, C. et al. Optimization of active layer morphology by small-molecule donor design enables over 15% efficiency in small-molecule organic solar cells. *J. Mater. Chem. A* 9, 13653–13660 (2021).
16. Wang, Y. et al. A novel wide-bandgap small molecule donor for high efficiency all-small-molecule organic solar cells with small non-radiative energy losses. *Energy Environ. Sci.* 13, 1309–1317 (2020).
17. Wang, X. et al. Over 15% efficiency all-small-molecule organic solar cells enabled by a C-shaped small molecule donor with tailorable asymmetric backbone. *Nano Energy* 81, 105612 (2021).
18. Liu, C. et al. All-Small-Molecule Organic Solar Cells Based on a Fluorinated Small Molecule Donor With High Open-Circuit Voltage of 1.07 V. *Frontiers in Chemistry* 8, 329 (2020).
19. Zhou, R. et al. Combining chlorination and sulfuration strategies for high-performance all-small-molecule organic solar cells. *Journal of Energy Chemistry* 52, 228–233 (2021).
20. Sun, R. et al. High-efficiency all-small-molecule organic solar cells based on an organic molecule donor with an asymmetric thieno[2,3-f] benzofuran unit. *Sci. China Chem.* 63, 1246–1255 (2020).
21. Qiu, B. et al. Highly Efficient All-Small-Molecule Organic Solar Cells with Appropriate Active Layer Morphology by Side Chain Engineering of Donor Molecules and Thermal Annealing. *Advanced Materials* 32, 1908373 (2020).
22. Wu, Q. et al. Modulation of Donor Alkyl Terminal Chains with the Shifting Branching Point Leads to the Optimized Morphology and Efficient All-Small-Molecule Organic Solar Cells. *ACS Appl. Mater. Interfaces* 12, 25100–25107 (2020).
23. Zhang, Z. et al. The post-treatment effects on open circuit voltages and device performances in a high efficiency all-small-molecule organic solar cell. *J. Mater. Chem. C* 8, 15385–15392 (2020).
24. Wu, Q. et al. Fluorination-substitution effect on all-small-molecule organic solar cells. *Sci. China Chem.* 62, 837–844 (2019).
25. Qin, J. et al. 15.3% efficiency all-small-molecule organic solar cells enabled by symmetric phenyl substitution. *Sci. China Mater.* 63, 1142–1150 (2020).
26. Zhou, R. et al. All-small-molecule organic solar cells with over 14% efficiency by optimizing hierarchical morphologies. *Nat Commun* 10, 5393 (2019).
27. Yue, Q. et al. 13.7% Efficiency Small-Molecule Solar Cells Enabled by a Combination of Material and Morphology Optimization. *Advanced Materials* 31, 1904283 (2019).
28. Duan, T. et al. Simple organic donors based on halogenated oligothiophenes for all small molecule solar cells with efficiency over 11%. *J. Mater. Chem. A* 8, 5843–5847 (2020).
29. Li, Y. et al. Efficient charge generation and low open circuit voltage loss enable a PCE of 10.3% in small molecule donor and polymer acceptor organic solar cells. *J. Mater. Chem. C* (2021) doi:10.1039/D1TC04428A.
30. Zhou, R. et al. Moving Alkyl-Chain Branching Point Induced a Hierarchical Morphology for Efficient All-Small-Molecule Organic Solar Cells. *Advanced Functional Materials* 30, 2005426 (2020).
31. Bin, H. et al. Precise Control of Phase Separation Enables 12% Efficiency in All Small Molecule Solar Cells. *Advanced Energy Materials* 10, 2001589 (2020).

32. Dong, X. et al. Improving Molecular Planarity by Changing Alky Chain Position Enables 12.3% Efficiency All-Small-Molecule Organic Solar Cells with Enhanced Carrier Lifetime and Reduced Recombination. *Sol. RRL* 4, 1900326 (2020).
33. Gao, J. et al. Over 14% efficiency nonfullerene all-small-molecule organic solar cells enabled by improving the ordering of molecular donors via side-chain engineering. *J. Mater. Chem. A* 8, 7405–7411 (2020).
34. Li, S. et al. Effects of the Center Units of Small-Molecule Donors on the Morphology, Photovoltaic Performance, and Device Stability of All-Small-Molecule Organic Solar Cells. *Sol. RRL* 5, 2100515 (2021).
35. Guo, J. et al. Fine-Tuning Miscibility and  $\pi$ - $\pi$  Stacking by Alkylthio Side Chains of Donor Molecules Enables High-Performance All-Small-Molecule Organic Solar Cells. *ACS Appl. Mater. Interfaces* 13, 36033–36043 (2021).
36. Wang, Y. et al. Modulating Crystallinity and Miscibility via Side-chain Variation Enable High Performance All-Small-Molecule Organic Solar Cells. *Chinese Journal of Chemistry* 39, 2147–2153 (2021).
37. Cheng, X. et al. “Twisted” conjugated molecules as donor materials for efficient all-small-molecule organic solar cells processed with tetrahydrofuran. *J. Mater. Chem. A* 7, 23008–23018 (2019).
38. Zhu, C. et al. A Quinoxaline-Based D–A Copolymer Donor Achieving 17.62% Efficiency of Organic Solar Cells. *Advanced Materials* 33, 2100474 (2021).
39. Gong, P. et al. Ultrafast Kinetics Investigation of a Fluorinated-Benzothiadiazole Polymer with an Increased Excited State Transition Dipole Moment Applied in Organic Solar Cells. *ACS Appl. Energy Mater.* 4, 9627–9638 (2021).
40. Wang, H. et al. Chlorination Enabling a Low-Cost Benzodithiophene-Based Wide-Bandgap Donor Polymer with an Efficiency of over 17%. *Advanced Materials* n/a, 2105483.
41. Wang, K. et al. Optimizing the Alkyl Side-Chain Design of a Wide Band-Gap Polymer Donor for Attaining Nonfullerene Organic Solar Cells with High Efficiency Using a Nonhalogenated Solvent. *Chem. Mater.* 33, 5981–5990 (2021).
42. Pang, S. et al. A Facile Synthesized Polymer Featuring B-N Covalent Bond and Small Singlet-Triplet Gap for High-Performance Organic Solar Cells. *Angewandte Chemie International Edition* 60, 8813–8817 (2021).
43. Tang, Y. et al. Optimizing the energy levels and crystallinity of 2,2'-bithiophene-3,3'-dicarboximide-based polymer donors for high-performance non-fullerene organic solar cells. *J. Mater. Chem. C* 9, 7575–7582 (2021).
44. Liu, Z. et al. Novel efficient acceptor1-acceptor2 type copolymer donors: Vinyl induced planar geometry and high performance organic solar cells. *Chemical Engineering Journal* 419, 129532 (2021).
45. Zhang, M., Xu, X., Yu, L. & Peng, Q. Efficient wide-band-gap copolymer donors for organic solar cells with perpendicularly placed benzodithiophene units. *Journal of Power Sources* 499, 229961 (2021).
46. Yuan, X. et al. A donor polymer based on 3-cyanothiophene with superior batch-to-batch reproducibility for high-efficiency organic solar cells. *Energy Environ. Sci.* 14, 5530–5540 (2021).
47. Zeng, A. et al. A Chlorinated Donor Polymer Achieving High-Performance Organic Solar Cells with a Wide Range of Polymer Molecular Weight. *Advanced Functional Materials* 31, 2102413 (2021).
48. Dai, T. et al. Fabrication of High VOC Organic Solar Cells with a Non-Halogenated Solvent and the Effect of Substituted Groups for “Same-A-Strategy” Material Combinations. *ACS Appl. Mater. Interfaces* 13, 21556–21564 (2021).
49. Guo, Q. et al. Optimized molecular aggregation via incorporating fluorinated unit in the polymer donor for 17.3% efficiency organic solar cells. *Chemical Engineering Journal* 134117 (2021) doi:10.1016/j.cej.2021.134117.
50. Wu, J. et al. Carboxylate substituted pyrazine: A simple and low-cost building block for novel wide bandgap polymer donor enables 15.3% efficiency in organic solar cells. *Nano Energy* 82, 105679 (2021).

51. Ha, J.-W. et al. Highly Efficient and Photostable Ternary Organic Solar Cells Enabled by the Combination of Non-Fullerene and Fullerene Acceptors with Thienopyrrolodione-based Polymer Donors. *ACS Appl. Mater. Interfaces* 12, 51699–51708 (2020).
52. Zhao, W. et al. Molecular Optimization Enables over 13% Efficiency in Organic Solar Cells. *J. Am. Chem. Soc.* 139, 7148–7151 (2017).
53. Xiao, J. et al. Surpassing 13% Efficiency for Polythiophene Organic Solar Cells Processed from Nonhalogenated Solvent. *Advanced Materials* 33, 2008158 (2021).
54. Sun, C. et al. High Efficiency Polymer Solar Cells with Efficient Hole Transfer at Zero Highest Occupied Molecular Orbital Offset between Methylated Polymer Donor and Brominated Acceptor. *J. Am. Chem. Soc.* 142, 1465–1474 (2020).
55. Sun, C. et al. D–A Copolymer Donor Based on Bithienyl Benzodithiophene D-Unit and Monoalkoxy Bifluoroquinoxaline A-Unit for High-Performance Polymer Solar Cells. *Chem. Mater.* 32, 3254–3261 (2020).
56. Chao, P. et al. A Benzo[1,2-b:4,5-c']Dithiophene-4,8-Dione-Based Polymer Donor Achieving an Efficiency Over 16%. *Advanced Materials* 32, 1907059 (2020).
57. Wang, Q. et al. Naphtho[2,3-c]thiophene-4,9-dione based polymers for efficient fullerene solar cells. *Polymer* 212, 123184 (2021).
58. Park, J. S. et al. Importance of Optimal Crystallinity and Hole Mobility of BDT-Based Polymer Donor for Simultaneous Enhancements of Voc, Jsc, and FF in Efficient Nonfullerene Organic Solar Cells. *Advanced Functional Materials* 30, 2005787 (2020).
59. Xu, X. et al. Subtle Polymer Donor and Molecular Acceptor Design Enable Efficient Polymer Solar Cells with a Very Small Energy Loss. *Advanced Functional Materials* 30, 1907570 (2020).
60. Tang, Y. et al. A New Wide Bandgap Donor Polymer for Efficient Nonfullerene Organic Solar Cells with a Large Open-Circuit Voltage. *Advanced Science* 6, 1901773 (2019).
61. Wang, Q. et al. Synergy Effect of Symmetry-Breaking and End-Group Engineering Enables 16.06% Efficiency for All-Small-Molecule Organic Solar Cells. *ACS Materials Lett.* 6, 713–719 (2024).
62. Han, D. et al. Small molecular donor materials based on electron withdrawing benzobisthiazole core unit enable an efficiency of 11.8% for organic solar cells. *Chemical Engineering Journal* 463, 142400 (2023).
63. Chen, Q., Li, Y., Hu, D., Lu, S. & Xiao, Z. Branched Terminal Alkyl Chain Enabling 15.7% Efficiency Oligothiophene Donor. *Solar RRL* 8, 2300802 (2024).
64. Ma, X. et al. Small Molecule Donors Design Rules for Non-Halogen Solvent Fabricated Organic Solar Cells. *Small* n/a, 2309042.
65. Liu, C., Wu, Z., Qiu, N., Li, C. & Lu, Y. Selenophene-containing benzodithiophene based donors with different alkyl chains in terminal groups for high-performance all-small-molecule organic solar cells. *New J. Chem.* 47, 2840–2846 (2023).
66. Pradhan, R. et al. Achieving High-Efficiency in Binary Organic Solar Cells by the Structural Fine-Tuning of Coumarin-Based Donor. *Solar RRL* 7, 2300032 (2023).
67. Ge, J. et al. Modulation of Molecular Stacking via Tuning 2-Ethylhexyl Alkyl Chain Enables Improved Efficiency for All-Small-Molecule Organic Solar Cells. *ACS Appl. Mater. Interfaces* 15, 10803–10811 (2023).
68. Cheng, X. et al. “Twisted” small molecule donors with enhanced intermolecular interactions in the condensed phase towards efficient and thick-film all-small-molecule organic solar cells. *J. Mater. Chem. A* 11, 13984–13993 (2023).
69. Wang, X. et al. High-Efficiency All-Small-Molecule Organic Solar Cells Based on New Molecule Donors with Conjugated Symmetric/Asymmetric Hybrid Cyclopentyl-Hexyl Side Chains. *Advanced Functional Materials* 33, 2300323 (2023).

70. Zhi, H.-F. et al. Isomeric Small Molecule Donor with Terminal Branching Position Directly Attached to the Backbone Enables Efficient All-Small-Molecule Organic Solar Cells with Excellent Stability. *Advanced Functional Materials* 33, 2300878 (2023).
71. Liu, C. et al. A novel chlorinated small molecule donor for efficient binary and ternary all-small-molecule organic solar cells. *Organic Electronics* 106, 106532 (2022).
72. Zhao, Y. et al. End Group Effect of Asymmetric Benzodithiophene-Based Donor with Liquid-Crystal State for Small-Molecule Binary Solar Cell. *Small* 19, 2205244 (2023).
73. Wu, S. et al. 15.51 % efficiency all-small-molecule organic solar cells achieved by symmetric thiazolyl substitution. *Nano Energy* 103, 107801 (2022).
74. Yang, L. et al. Terminal alkyl chain tuning of small molecule donor enables optimized morphology and efficient all-small-molecule organic solar cells. *Dyes and Pigments* 200, 110147 (2022).
75. Lin, T. et al. Isomerization of Benzothiadiazole Yields a Promising Polymer Donor and Organic Solar Cells with Efficiency of 19.0%. *Advanced Materials* n/a, 2312311.
76. Hu, L., Wang, L., Ye, L., Zhao, B. & Tan, S. Polymer donors based on alkyloxime-substituted thiophene and 6-undecylthiopheno[3,2-b]thiophene for efficient organic solar cells. *Journal of Polymer Science* (2024) doi:10.1002/pol.20230883.
77. Wang, X. et al. Dithienoquinoxaline-quaterthiophene wide bandgap donor polymers with strong interchain aggregation for efficient organic solar cells processed with a non-halogenated solvent. *J. Mater. Chem. A* (2024) doi:10.1039/D3TA08020J.
78. Xu, G. et al. Novel Narrow Band-Gap Copolymers Based on Pyridinthiadiazole for Semitransparent Organic Solar Cells. *J. Phys. Chem. C* 128, 1893–1900 (2024).
79. Lu, H. et al. Chlorinated Thiazole-Based Low-Cost Polymer Donors for High Efficiency Binary and Ternary Organic Solar Cells. *CCS Chemistry* 0, 1–10 (2023).
80. Zhang, L., Zhang, Z., Liang, H., Guo, X. & Zhang, M. A Non-Halogenated Polymer Donor Based on Imide Unit for Organic Solar Cells with Efficiency Nearly 16%. *Chinese Journal of Chemistry* 41, 2095–2102 (2023).
81. Kong, Y. et al. Semicrystalline Unfused Polymer Donors with Backbone Halogenation toward Cost-Effective Organic Solar Cells†. *Chinese Journal of Chemistry* n/a,.
82. Ha, J.-W., Park, B., Ko, S.-J. & Hwang, D.-H. Highly crystalline polycyclic aromatic lactam-based regioregular wide-band gap polymer donors for organic solar cells. *J. Mater. Chem. C* 12, 80–87 (2023).
83. Su, M. et al. Manipulating the Alkyl Chains of Naphthodithiophene Imide-Based Polymers to Concurrently Boost the Efficiency and Stability of Organic Solar Cells. *ACS Appl. Mater. Interfaces* 15, 37371–37380 (2023).
84. Hu, K. et al. Flexible side-chain optimization in polymer donor enables improved photovoltaic performance. *Organic Electronics* 116, 106765 (2023).
85. Zheng, J. et al. Effect of diazine isomers on photovoltaic properties of simple and efficient wide band gap polymer donor materials. *Organic Electronics* 125, 106964 (2024).
86. Zhang, M. et al. Side Chain Engineering of Two-Dimensional Polymeric Donors for High-Efficiency Organic Solar Cells. *Energy Fuels* 37, 6122–6128 (2023).
87. Pu, M. et al. Chlorination and Position Isomerization to Enhance the Photovoltaic Performance of Polymer Donors. *Macromolecules* 56, 5865–5872 (2023).
88. Yamanaka, K. et al. Interplay Between  $\pi$ -Conjugated Polymer Donors and Acceptors Determines Crystalline Order of Their Blends and Photovoltaic Performance. *Advanced Energy Materials* 13, 2203443 (2023).
89. Shen, S., Tu, Q., Tao, H., Ma, Y. & Zheng, Q. Side-chain engineering of wide-bandgap copolymers based on two different electron-deficient units for high-performance polymer solar cells. *Polym. Chem.* 14, 4227–4234 (2023).



90. Sato, N., Hwang, S., Tsuchii, Y. & Yasuda, T. Fused polycyclic lactam-based  $\pi$ -conjugated polymers for efficient nonfullerene organic solar cells. *J. Mater. Chem. A* 11, 9840–9845 (2023).
91. Tang, H. et al. Dithienobenzoselenadiazole-Based Polymer Donors with Tuned Side Chains for Efficient Polymer Solar Cells. *ACS Appl. Energy Mater.* 6, 4079–4088 (2023).
92. Weng, F. et al. Fluorination strategy on  $\pi$ -bridge of polymer donor for efficient photovoltaic performance. *Journal of Power Sources* 580, 233331 (2023).
93. Chen, J. et al. A Multifluorination Strategy Toward Wide Bandgap Polymers for Highly Efficient Organic Solar Cells. *Angewandte Chemie International Edition* 62, e202215930 (2023).
94. Xu, L.-Y. et al. A facile synthetic approach based on thieno[3,4-c]pyrrole-4,6-dione to construct polymer donors for highly efficient organic solar cells. *Energy Environ. Sci.* 16, 3942–3950 (2023).
95. Gao, Y. et al. Asymmetric  $\Pi$ -Bridge Engineering Enables High-Permittivity Benzo[1,2-B:4,5-b']Difuran-Conjugated Polymer for Efficient Organic Solar Cells. *Advanced Materials* n/a, 2306373.
96. Liao, J. et al. Enhanced efficiency of polymer solar cells via simple fluorination on the  $\pi$ -bridge of polymer donors. *Organic Electronics* 108, 106611 (2022).
97. Jiang, Q. et al. Reducing steric hindrance around electronegative atom in polymer simultaneously enhanced efficiency and stability of organic solar cells. *Nano Energy* 101, 107611 (2022).
98. Shao, Y., Gao, Y., Sun, R., Zhang, M. & Min, J. A Versatile and Low-Cost Polymer Donor Based on 4-Chlorothiazole for Highly Efficient Polymer Solar Cells. *Advanced Materials* 35, 2208750 (2023).
99. Deng, J. et al. Layer-by-layer and non-halogenated solvent processing of benzodithiophene-free simple polymer donors for organic solar cells. *Chemical Engineering Journal* 443, 136515 (2022).
100. Liao, J. et al. Fluorine-Substituted  $\pi$ -Bridge through a Simple Method for Efficient Polymer Donor. *Solar RRL* 6, 2200697 (2022).
101. Keshtov, M. L. et al. New wide band gap  $\pi$ -conjugated copolymers based on anthra[1,2-b: 4,3-b': 6,7-c''] trithiophene-8,12-dione for high performance non-fullerene polymer solar cells with an efficiency of 15.07 %. *Polymer* 251, 124892 (2022).
102. Kini, G. P. et al. Tailoring Microstructure and Morphology via Sequential Fluorination to Enhance the Photovoltaic Performance of Low-Cost Polymer Donors for Organic Solar Cells. *Macromolecular Rapid Communications* 43, 2200070 (2022).
103. Ou, Z. et al. Engineering of the alkyl chain branching point on a lactone polymer donor yields 17.81% efficiency. *J. Mater. Chem. A* 10, 3314–3320 (2022).
104. Nakao, N. et al. Pronounced Backbone Coplanarization by  $\pi$ -Extension in a Sterically Hindered Conjugated Polymer System Leads to Higher Photovoltaic Performance in Non-Fullerene Solar Cells. *ACS Appl. Mater. Interfaces* 13, 56420–56429 (2021).
105. Liu, W. et al. Design of Near-Infrared Nonfullerene Acceptor with Ultralow Nonradiative Voltage Loss for High-Performance Semitransparent Ternary Organic Solar Cells. *Angewandte Chemie International Edition* n/a, e202116111.
106. Li, D.-X. et al. Quinoxaline-based Polymers with Asymmetric Aromatic Side Chain Enables 16.27% Efficiency for Organic Solar Cells. *Chin J Polym Sci* 41, 1002–1010 (2023).
